# Supplementary material
Source: PubMed Central journal article supplement (PMC4827674)
Supplement: oc5b00121_si_002.pdf [file oc5b00121_si_002.pdf]

## *Supporting Information*

### Use of $^{18}\text{F}$ - 2-Fluorodeoxyglucose to Label Antibody Fragments for Immuno-Positron Emission Tomography of Pancreatic Cancer

Mohammad Rashidian,<sup>†,⊥</sup> Edmund J. Keliher,<sup>‡</sup> Michael Dougan,<sup>†,§</sup> Patrick K. Juras,<sup>†,⊥</sup> Marco Cavallari,<sup>†</sup> Gregory R. Wojtkiewicz,<sup>‡</sup> Johanne T. Jacobsen,<sup>†</sup> Jerre G. Edens,<sup>†</sup> Jeroen M. J. Tas,<sup>†</sup> Gabriel Victora,<sup>†</sup> Ralph Weissleder,<sup>‡,||</sup> and Hidde Ploegh\*,<sup>†,⊥</sup>

<sup>†</sup>Whitehead Institute for Biomedical Research, Cambridge, Massachusetts 02142, United States

<sup>‡</sup>Center for Systems Biology Department and Department of Radiology, Massachusetts General Hospital, 185 Cambridge Street, Boston, Massachusetts 02114, United States

<sup>§</sup>Department of Gastroenterology, Massachusetts General Hospital, 185 Cambridge Street, Boston, Massachusetts 02114, United States

<sup>||</sup>Department of Systems Biology, Harvard Medical School, 200 Longwood Avenue, Boston, Massachusetts 02115, United States

<sup>⊥</sup>Department of Biology, Massachusetts Institute of Technology, Cambridge, Massachusetts 02142, United States

## Table of contents

|                                                                                   |    |
|-----------------------------------------------------------------------------------|----|
| Synthesis of (Gly) <sub>3</sub> -TCO.....                                         | 3  |
| Synthesis of Aminoxy-tetrazine.....                                               | 3  |
| Synthesis of (Gly) <sub>3</sub> -Texas Red.....                                   | 4  |
| Catalyzed oxime ligation between 2-Fluorodeoxyglucose and aminoxy-tetrazine. .... | 5  |
| Enzymatic incorporation of substrates into proteins using sortase.....            | 5  |
| LC-MS analysis of VHHs and their corresponding sortagged products.....            | 6  |
| Two-photon imaging.....                                                           | 6  |
| Synthesis of <sup>18</sup> F –Tetrazine.....                                      | 7  |
| Synthesis and characterization of <sup>18</sup> F –VHHs. ....                     | 7  |
| PET-CT imaging.....                                                               | 7  |
| Blood half-life measurement of <sup>18</sup> F-VHHs.....                          | 8  |
| PET Standard Uptake Value Calculation.....                                        | 8  |
| Analysis of the purity of the radiolabeled VHHs.....                              | 8  |
| Sequence of VHH7, DC1, DC8, DC14 and DC15. ....                                   | 9  |
| Supporting Figures.....                                                           | 11 |
| References.....                                                                   | 15 |

## Synthesis of (Gly)<sub>3</sub>-TCO.

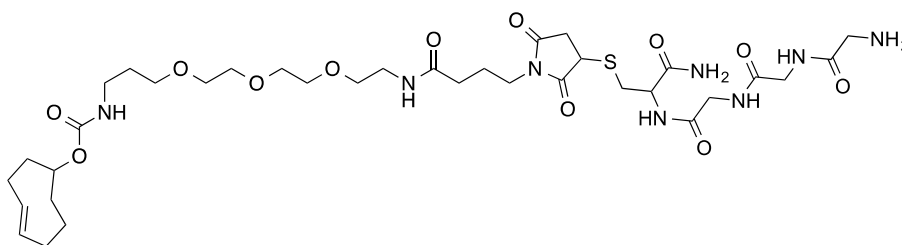

The tetrapeptide GGGC was synthesized by standard solid phase peptide synthesis. Maleimide-TCO (from ClickChemistryTools) was dissolved in 0.05 M NaCO<sub>3</sub> buffer pH 8.3. The tetrapeptide GGGC was added and left to stir at room temperature for 2 h until LC-MS indicated near-complete conversion to the product. The solution was filtered and purified by reverse phase-HPLC with a semi-preparative column (Phenomenex, C<sub>18</sub> column, Gemini, 5 μm, 10x250 mm) at a flow rate of 5.0 mL/min.; solvent A: 0.1% TFA in H<sub>2</sub>O, solvent B: 0.1% TFA in CH<sub>3</sub>CN. (G)<sub>3</sub>-TCO eluted at 30–35% solvent B. Fractions containing pure product were collected and lyophilized. LC-MS calculated for C<sub>35</sub>H<sub>59</sub>N<sub>8</sub>O<sub>12</sub>S [M+H]<sup>+</sup> 815.40, found 815.41.

## Synthesis of Aminoxy-tetrazine.

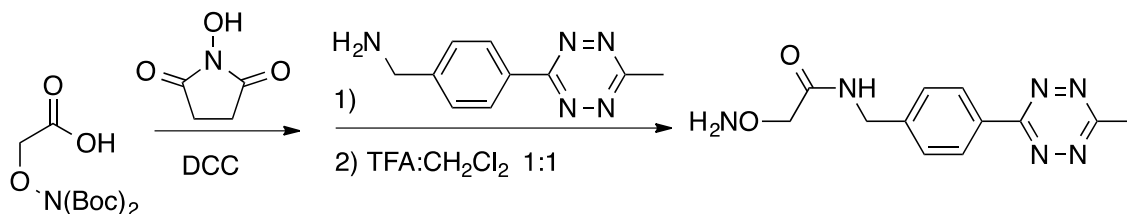

Bis-Boc-aminoxy acetic acid (0.5 g, 1.7 mmol) was dissolved in THF (25 mL) in a 50 mL flask and the solution was cooled to 0 °C in an ice bath. N,N'-Dicyclohexylcarbodiimide (DCC) (0.39 g, 1.9 mmol) was added slowly to the solution followed by the addition of N-hydroxysuccinimide (NHS) (0.22 g, 1.9 mmol). The reaction was stirred at 0 °C for an additional h and then overnight at room temperature until TLC showed complete conversion to the product. The solution was filtered to remove the insoluble N,N'-Dicyclohexylurea (DCU) byproduct and

the solvent was removed *in vacuo*. The product was used without further purification. Amino-tetrazine (0.2 g, 1.0 mmol) was dissolved in DMF (10 mL) in a 25 mL flask. The crude product from the previous step, NHS activated bis-boc-aminoxy-acetic acid (0.58 g, 1.5 mmol), was added to the solution and the reaction was stirred at room temperature for 3 h when TLC analysis showed complete conversion to the product. Next, the solvent was removed *in vacuo* and a mixture of 1:1 TFA:CH<sub>2</sub>Cl<sub>2</sub> (10 mL) was added to the flask. The reaction was allowed to proceed for 2 h at room temperature when TLC showed complete conversion to the product. The solvent was removed *in vacuo* and the product was redissolved in a mixture of 1:1 DMF:H<sub>2</sub>O (1 mL). The solution was filtered and purified by reverse phase-HPLC with a semi-preparative column (Phenomenex, C<sub>18</sub> column, Gemini, 5 μm, 10x250 mm) at a flow rate of 5.0 mL/min; solvent A: 0.1% TFA in H<sub>2</sub>O, solvent B: 0.1% TFA in CH<sub>3</sub>CN. Aminoxy-tetrazine eluted at 25–30% solvent B. Fractions containing pure product were collected and lyophilized. LC-MS calculated for C<sub>12</sub>H<sub>15</sub>N<sub>6</sub>O<sub>2</sub> [M+H]<sup>+</sup> 275.12, found 275.10.

### Synthesis of (Gly)<sub>3</sub>-Texas Red.

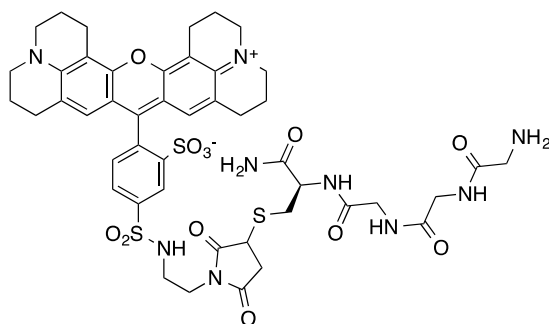

The tetrapeptide GGGC was synthesized by standard solid phase peptide synthesis. Maleimide-Texas Red (from Vector lab) was dissolved in 20 mM NaHCO<sub>3</sub> buffer (pH 8.3). The tetrapeptide GGGC was added and left to stir at room temperature for 3 h until TLC (1:2 Hex:EtOAc v/v) indicated near-complete conversion to the product. The solution was filtered and purified by reverse phase-HPLC with a semi-preparative column (Phenomenex, C<sub>18</sub> column, Gemini, 5 μm, 10x250 mm) at a flow rate of 5.0 mL/min; solvent A: 0.1% TFA in H<sub>2</sub>O, solvent B: 0.1% TFA in CH<sub>3</sub>CN. (G)<sub>3</sub>-Texas Red eluted at 40–45% solvent B. Fractions containing pure product were collected and lyophilized. LC-MS calculated for C<sub>46</sub>H<sub>54</sub>N<sub>9</sub>O<sub>12</sub>S<sub>3</sub>[M+H]<sup>+</sup> 1020.305, found 1020.310.

### Catalyzed oxime ligation between 2-Fluorodeoxyglucose and aminoxy-tetrazine.

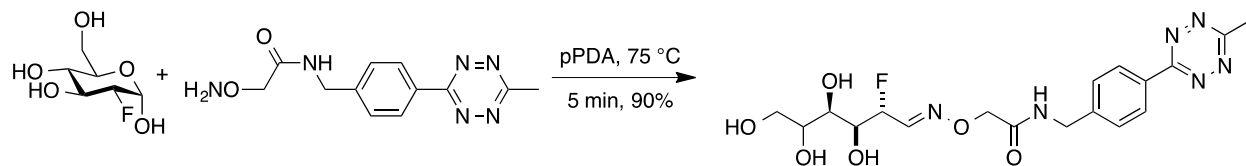

Reaction mixtures (50  $\mu$ L) contained aminoxy-tetrazine (0.2-0.3 M), 2-Fluorodeoxyglucose (1 mM) and p-phenylenediamine (0.4-0.6 M). After incubation at 75 °C with agitation for ~5-10 min, reaction product was analyzed by LC-MS and HPLC, with yields generally >90%. LC-MS calculated for  $C_{18}H_{24}FN_6O_6$   $[M+H]^+$  439.17, found 439.17.

### Enzymatic incorporation of substrates into proteins using sortase.

The penta-mutant sortase A, with an improved  $k_{cat}$ , was used.<sup>1</sup> Reaction mixtures (1 mL) contained Tris·HCl (50 mM, pH 7.5),  $CaCl_2$  (10 mM), NaCl (150 mM), triglycine-containing probe (500  $\mu$ M), LPETG-containing probe (100  $\mu$ M), and sortase (5  $\mu$ M).<sup>2, 3</sup> After incubation at 4 °C with agitation for 2 h, reaction products were analyzed by LC-MS. Yields were generally >90%. When the yield was below 90%, the reaction was allowed to proceed for an additional two hours, with addition of sortase to 10  $\mu$ M and triglycine-containing probe to 1 mM. Ni-NTA beads were added to the reaction mixture with agitation for 5 min at 25 °C followed by centrifugation to remove sortase and any remaining unreacted His-tagged substrate. The final product was purified by size exclusion chromatography in PBS or Tris·HCl (50 mM, pH 7.5). The labeled protein was stored at -80 °C with 5% glycerol for up to six months.

## LC-MS analysis of VHHs and their corresponding sortagged products.

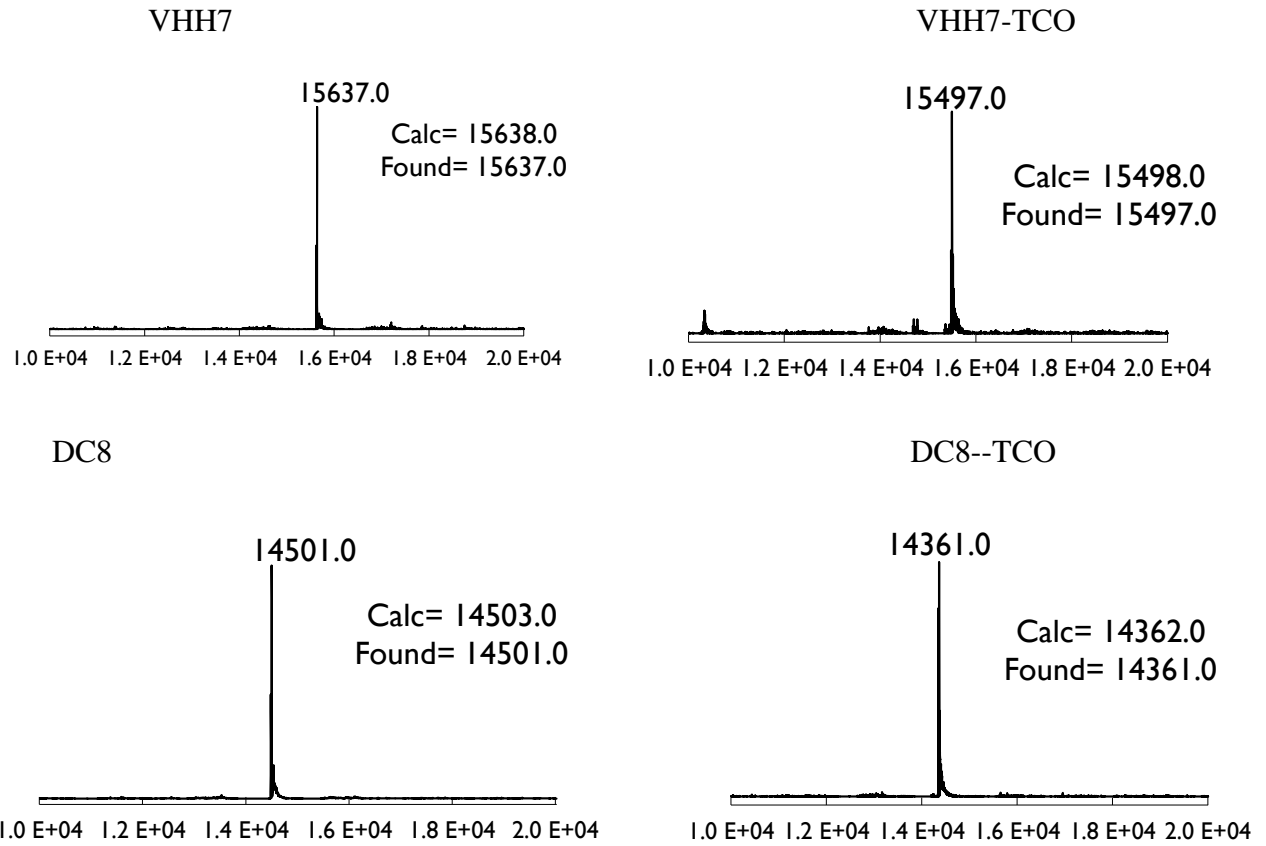

### Two-photon imaging.

Two-photon imaging was performed with an Olympus BX61 upright microscope (Olympus 25X 1.05 NA Plan Objective), fitted with a SpectraPhysics MaiTai DeepSee laser. Images were acquired using 910 nm excitation and following filters: 2<sup>nd</sup> harmonic emission (from collagen) (460-510 nm) and GFP (495-540 nm), separated by a 505 nm dichroic mirror, and a third filter (575-630 nm) for the Texas Red signal. Images were acquired with 5  $\mu$ m Z resolution with Olympus FluoView FC1000 software. Tile images were saved as JPEG files. Images in Figures 2G, 2F, 3H and Image 01 in the SI were processed to obtain a scale bar in Imaris v 7.4.0; no intensity or contrast adjustments were made.

### Synthesis of $^{18}\text{F}$ –Tetrazine.

[ $^{18}\text{F}$ ]-FDG (no carrier added, (n.c.a.)) in  $\text{H}_2\text{O}$  ( $8.6 \pm 0.6$  mCi), purchased from PETNET, was transferred to a reaction vessel (10 mL) and the solvent was removed *in vacuo*. After drying, DI water (20  $\mu\text{L}$ ) and aminoxy-tetrazine (25  $\mu\text{L}$ , 0.35 M stock solution in DMSO) were added, and the solution mixture was transferred to a 0.5 mL tube containing pPDA (2.5 mg) and was heated to 70  $^\circ\text{C}$  for 10 min with constant agitation. The mixture was diluted with  $\text{H}_2\text{O}$  (1 mL) and subjected to preparative HPLC purification (17.5% MeCN in  $\text{H}_2\text{O}$ , 0.1% TFA at 4.8 mL/min using a Phenomenex,  $\text{C}_{18}$  column, Gemini, 5  $\mu\text{m}$ , 10 x 250 mm).  $^{18}\text{F}$ -Tetrazine was collected ( $t_{\text{R}} = 14.0$  min) in 5–6 mL of solvent, diluted with  $\text{H}_2\text{O}$  (40 mL) and isolated by manual  $\text{C}_{18}$  solid phase extraction. Elution from the  $\text{C}_{18}$  cartridge with MeCN (4 x 200  $\mu\text{L}$ ) gave  $2.3 \pm 0.5$  mCi, a  $50.7 \pm 7.3\%$  decay-corrected radiochemical yield in an average time of 105 min ( $n = 4$ ).

### Synthesis and characterization of $^{18}\text{F}$ –VHHs.

In a typical reaction, a 1.5-mL centrifuge tube was loaded with VHH-TCO in 1xPBS (40  $\mu\text{L}$ , 150  $\mu\text{M}$ ), 1xPBS (150  $\mu\text{L}$ ), and  $^{18}\text{F}$ -Tetrazine in DMSO ( $1.4 \pm 0.2$  mCi (51.8 MBq), 100  $\mu\text{L}$ ). The tube was sealed and shaken at room temperature for 20 min. The mixture was analyzed by radio-TLC (ITLC, 100% MeCN,  $R_{\text{f}}$   $^{18}\text{F}$ -Tetrazine = 0.9,  $R_{\text{f}}$   $^{18}\text{F}$ -VHH = 0.0) showing 90% conversion to  $^{18}\text{F}$ -VHH. The reaction mixture was loaded onto a PD-10 size-exclusion cartridge (GE Healthcare) and elution with 1xPBS provided  $0.5 \pm 0.2$  mCi (18.5 MBq) of  $^{18}\text{F}$ -VHH in 55.7% decay-corrected radiochemical yield.

### PET-CT imaging.

All procedures and animal protocols were approved by the Massachusetts General Hospital subcommittee on research animal care. For all imaging experiments, mice were anesthetized using 1.5% isoflurane in  $\text{O}_2$  at a flow rate of  $\sim 1$  L/min. Mice were imaged with PET-computed tomography (CT) using an Inveon small animal scanner (Siemens, Munich, Germany). Each PET acquisition took approximately 30 minutes. High resolution fourier rebinned PET images were reconstructed by a 3D ordered subsets expectation algorithm using maximum a priori (OSEM3D/MAP) with 18 MAP iterations and 2 OSEM3D iterations into  $0.796 \times 0.796 \times 0.861$  mm images on a  $128 \times 128 \times 159$  image matrix. Peak sensitivity of the Inveon accounts for 11.1% of positron emission, with a mean resolution of 1.65 mm. More than 100 counts were

acquired per pixel, and the mean signal-to-noise ratio was greater than 20. CT images were acquired using an 80 kVp 500 mA x-ray tube over 360 projections on a 125mm detector. A modified feldkamp conebeam reconstruction algorithm (COBRA Exxim incorporated) was used to reconstruct the CT images into a 110  $\mu\text{m}$  isotropic image matrix of 512 x 512 x 768. Reconstruction of data sets, PET-CT registration, and image analysis were performed using IRW software (Siemens). Two- and three-dimensional visualizations were produced using the DICOM viewer OsiriX (The OsiriX Foundation, Geneva, Switzerland).

#### **Blood half-life measurement of $^{18}\text{F}$ -VHHs.**

Mice were administered  $30 \pm 3$  uCi of  $^{18}\text{F}$ -VHH7 by intravenous tail-vein injection. Blood samples were obtained by retro-orbital puncture using tared, heparinized capillary tubes. Blood samples and capillaries were weighed and radioactivity was measured using a Perkin-Elmer Wallac Wizard 3" 1480 Automatic Gamma Counter. Values are expressed as percentages of the injected dose per gram of tissue were fit (least squares) to a two-compartment bi-exponential decay model was performed using GraphPad Prism 4.0c (Figure S3).

#### **PET Standard Uptake Value Calculation.**

Standard uptake value (SUV) is the derived ratio of tissue radioactivity concentration (Bq/mL) and the injected radioactivity per gram of the mouse's body weight. The calculation used the following equation:  $\text{SUV} = (\text{region of interest radioactivity concentration})/(\text{injected activity}/\text{mouse total mass})$ .

#### **Analysis of the purity of the radiolabeled VHHs.**



The purity of the radiolabeled VHHs were assessed with TLC performed on silica impregnated glass sheets (ITLC plates, Pall Life Sciences). Plates for  $^{18}\text{F}$ -VHHs were developed with 100% acetonitrile and analyzed using a Bioscan AR-2000 scanner operated by WinScan V3 software package.

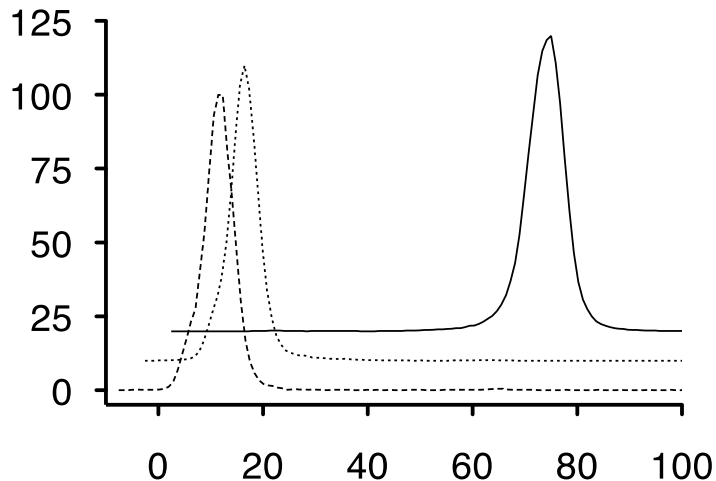

**Sequence of VHH7, DC1, DC8, DC14 and DC15.**

**VHH7:**

**Nucleic Acid:**

CAGGTGCAGCTGCAGGAGTCAGGGGGAGGATTGGTGCAGGCTGGGGACTCTCTGAG  
 ACTCTCCTGCGCAGCCTCTGGACGCACCTTCAGTCGCGGTGTAATGGGCTGGTTCCG  
 CCGGGCTCCAGGGAAGGAGCGTGAGTTTGTAGCAATCTTTAGCGGGAGTAGCTGGA  
 GTGGTCGTAGTACATACTATTCAGACTCCGTAAAGGGCCGATTCACCATCTCCAGAG  
 ACAACGCCAAGAACACGGTGTATCTGCAAATGAACGGCCTGAAACCTGAGGACACG  
 GCCGTTTATTACTGTGCAGCGGGATATCCGGAGGCGTATAGCGCCTATGGTCGGGAG  
 AGTACATATGACTACTGGGGCCAGGGGACCCAGGTCACCGTCTCCTCAGGATCCCTT  
 CCTGAAACTGGT

**Peptide:**

QVQLQESGGGLVQAGDSLRLSCAASGRTRFSRGVMGWFRRAPGKEREFVAIFSGSSWSG  
 RSTYYSDSVKGRFTISRDNKNTVYLQMNGLKPEDTAVYYCAAGYPEAYSAYGRESTY  
 DYWGQGTQVTVSSGSLPETGGHHHHHH

**DC1:**

**Nucleic Acid:**

CAGGTGCAGCTGCAGGAGTCAGGGGGAGGATTGGTGCAGGCTGGGGGCTCTCTGAG  
ACTCTCCTGTGCAGCCTCTGGACGCACCTTCAGTAGGTCAGCCATGGGCTGGTTCCG  
CCAGGCTCCAGGGAAGGAGCGTGAGTTTGTAGCAACTATTAGTTGGAGTGGTGGTG  
TCACATACTATGCAGACTCCGTGAAGGGCCGATTCACCATCTCCAGAGACAACGCCA  
AGAACACGGTGTATCTGCAAATGAACGGCCTGAAACCTGAGGACACGGCCGTTTAT  
TACTGTGCAGCGGGATATCCGGAGGCGTATAGCGCCTATGGTCCGGGAGAGTACATA  
TGACTACTGGGGCCAGGGGACCCAGGTCACCGTCTCCTCAGGATCCCTTCCTGAAAC  
TGGT

**Peptide:**

QVQLQESGGGLVQAGGSLRLSCAASGRFTFSRSAMGWFRQAPGKEREFVATISWSGGVT  
YYADSVKGRFTISRDNKNTVYLQMNLKPEDTAVYYCAAGYPEAYSAYGRESTDYD  
WGQGTQVTVSSGGLPETGGHHHHHH

**DC8:**

**Nucleic Acid:**

CAGGTGCAGCTGCAGGAGTCAGGGGGAGGATTGGTGCAGCCTGGGGGGTCTCTGAG  
ACTCTCCTGTACAGCCTCTGGATTCACATTCAGTACTTACTACATGAGCTGGGTCCG  
AAGGCTCCAGGGAAGGGGCCCGAGTGGGTCTCAGTTATGAATAGTAGTGGTGGTGA  
CACAAGGTATGCAGACTTCGTGAAGGGCCGATTCACCATCTCCAGAGACAACGCCA  
AGAACACACTGTATCTCAAATGAACAGCCTGAAACCTGAGGATACGGCCCTGTATT  
ACTGTGCGCAAGGTAGATCAGATATATACCCAACCTTCACGCGGGGCCAGGGGACC  
CAGGTCACCGTCTCCTCAGGAGGACTGCCGGAACCGGC

**Peptide:**

QVQLQESGGGLVQPGGSLRLSCTASGFTFSTYYMSWVRKAPGKGPEWVSVMNSSGGD  
TRYADSVKGRFTISRDNKNTLYLQMNSLKPEDTALYYCAQGRSDIYPTFTRGQGTQV  
VSSGSLPETGGHHHHHH

**DC14:**

**Nucleic Acid:**

CAGGTGCAGCTGCAGGAGTCAGGGGGAGGATTGGTGCAGGCTGGGGGCTCTCTGAG  
ACTCTCCTGTGCAGCCTCTGGACGCACCTTCGGATATGCCTTGGGCTGGTTCCGCCA  
GGCTCCGGGCAAGGAGCGTGAGTTTGTAAACAGCTATTAAGTGGAGTGGTGGTAGGT  
TAGGCTATGCAGACTCCGTGAAGGGTCGATTCACCATCTCCAAAGACAACACTACAAG  
AACACGTTGTATCTGCAAATGAACGGCCTGAAACCTGAGGACACGGCCGTTTATTAC  
TGTGCAGCCGGGAGGGGCTCGACCCGCTCTGATGACTATGACTACTGGGGCCAGGG  
GACCCAGGTCACCGTCTCCTCAGGATCCCTTCCTGAAACTGGT

**Peptide:**

QVQLQESGGGLVQAGGSLRLSCAASGRFTFGYALGWFRQAPGKEREFVTAINWSGGRLG  
YADSVKGRFTISKDNYKNTLYLQMNLKPEDTAVYYCAAGRGSTRSDDYDYWGQGTQ  
VTVSSGSLPETGGHHHHHH

**DC15:**

**Nucleic Acid:**

CAGGTGCAGCTGCAGGAGTCAGGGGGAGGATTGGTGCAGCCTGGGGCGTCTCTGAG  
 ACTCTCCTGCGTTTCTGCGTTCTCCTTAGATCATTATTCCGTAGCCTGGTTCCGCCAG  
 GCCCCAGGGAAGGAGCGTGAGGGGGTCTCATGTACAGTCGGTCAAATAAAGCCAC  
 GGACTATGCAGACTCCGTGAAGGGCCGATTCACCATCTCCAGAGACAGCGCCAAGC  
 GCACGGTGTATCTGCAAATGAACAACCTGAAACCAGAAGACACAGCCGTATATTAC  
 TGTGCAGTCAAACAATGGGGAATGTGCACTGGTGGTGGTTTGGGGCCGTTCCCAGTAT  
 GACTACTGGGGCCAGGGGACCCAGGTCACCGTCTCCTCAGGATCCCTTCTGAAACT  
 GGT

**Peptide:**

QVQLQESGGGLVQPGASLRLSCVSAFSLDHYSVAWFRQAPGKEREGVVSCHSRSNKATD  
 YADSVKGRFTISRDSAARTVYLQMNNLKPEDTAVYYCAVKQWGMCTGGVWGRSQYD  
 YWGQGTQVTVSSGSLPETGGHHHHHH

**Supporting Figures.**

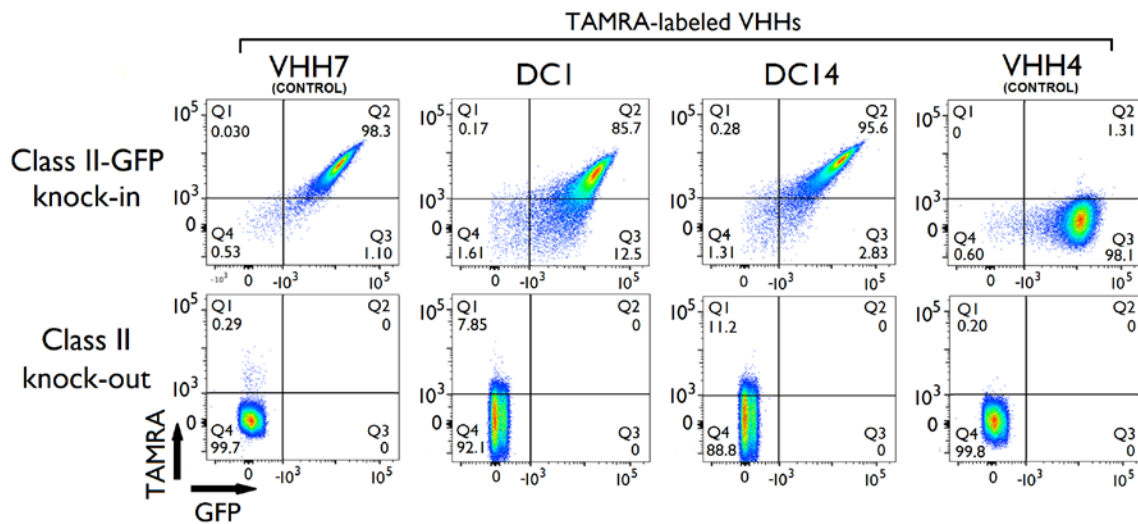

**Figure S1.** *DC1 and DC14 specifically recognize the mouse Class II MHC complex:*  $10^6$  splenocytes isolated from C57BL/6 class II-GFP knock-in and class II knock-out mice were stained with TAMRA-sorted VHHs as indicated. Plots are gated on live, CD19+ cells. VHH7 has been previously demonstrated to recognize mouse MHC class II. DC1 and DC14 are novel VHHs isolated through staining of dendritic cells. VHH4 is specific for human MHC class II and does not recognize the murine homologue.

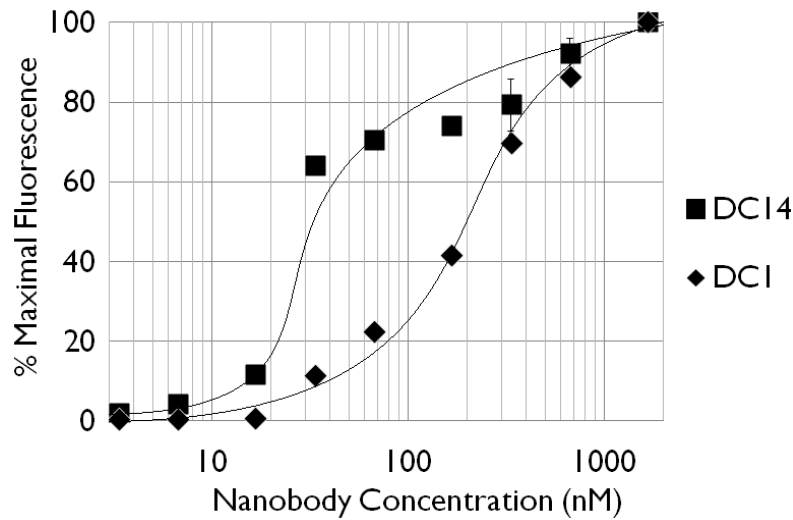

**Figure S2.** *DCI4 is able to stain murine B-cells at concentrations too low for DCI staining:*  $10^6$  splenocytes isolated from WT C57/BL6 mice were stained with the indicated concentrations of TAMRA-labeled VHH. Populations were gated on live, CD19+ cells, and the mean TAMRA fluorescence of each population is plotted. These data are derived from a single flow cytometry run but are consistent across numerous replicates (n=5).

# TAMRA-labeled VHH

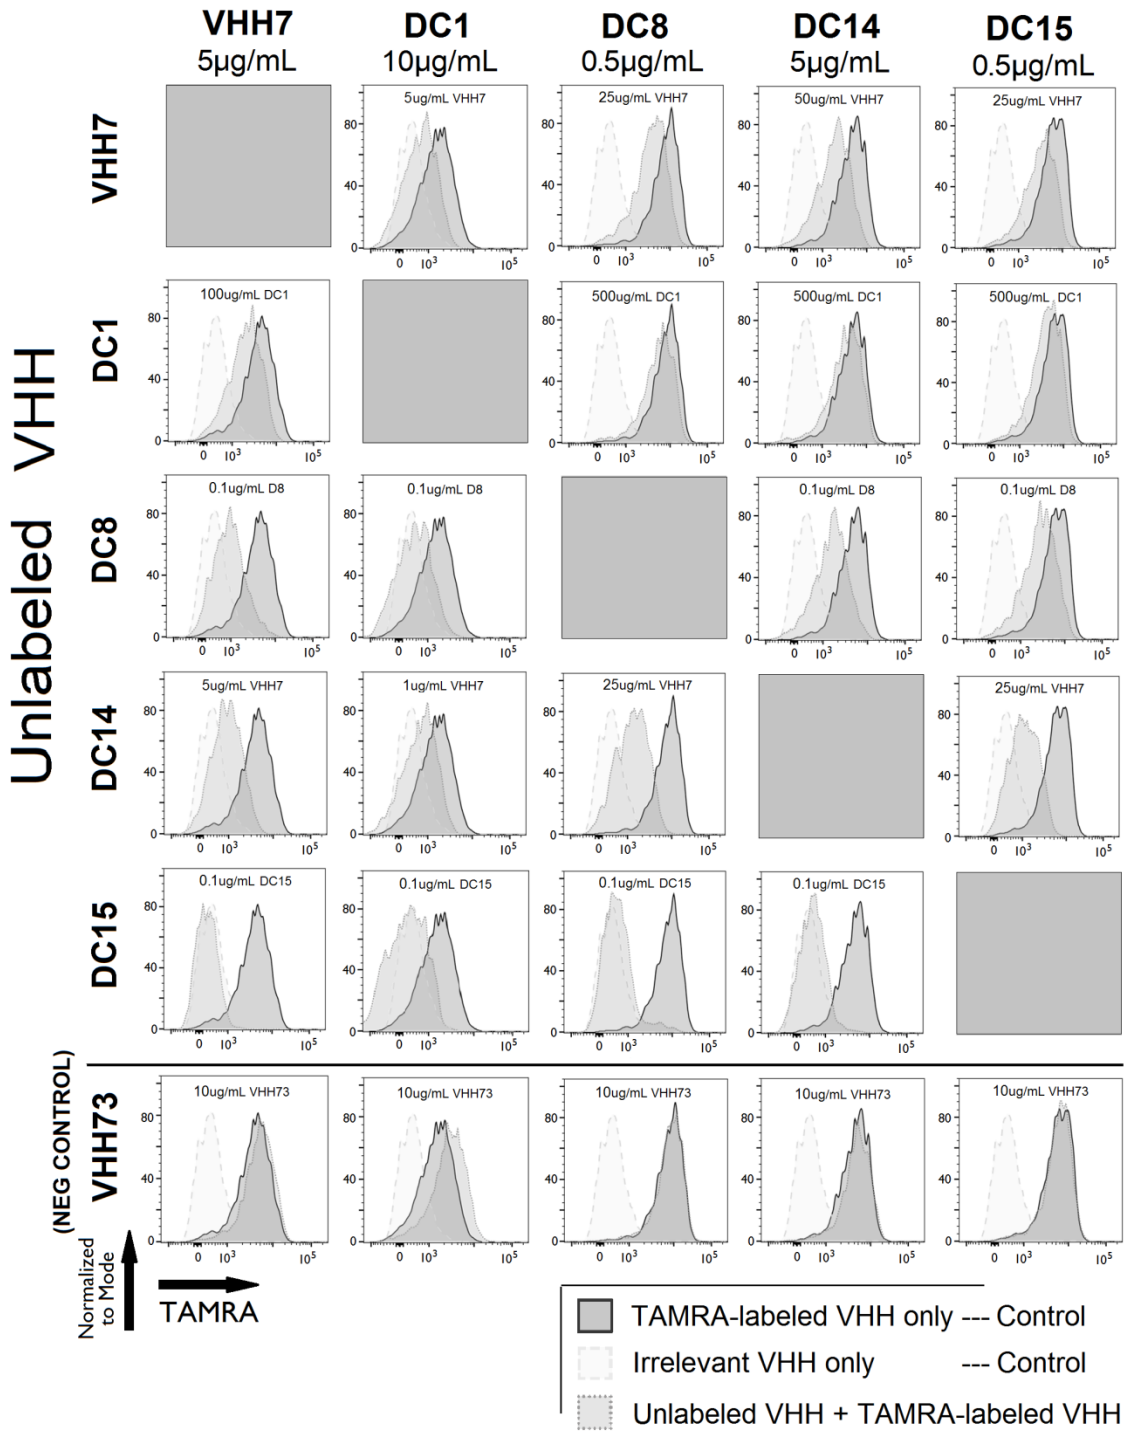

**Figure S3.** *VHH7, DC1, DC8, DC14, and DC15 compete for a common binding epitope:*  $10^6$  splenocytes isolated from WT C57/BL6 mice were co-stained with TAMRA-labeled VHH and a variable concentration of unlabeled VHH. The FACS plots indicate the minimum concentration of unlabeled VHH required for a 10% reduction in TAMRA fluorescence compared to a single-stained control. VHH73 is specific for murine T-cells and was used to co-stain lymphocyte populations as a negative control for binding interference.

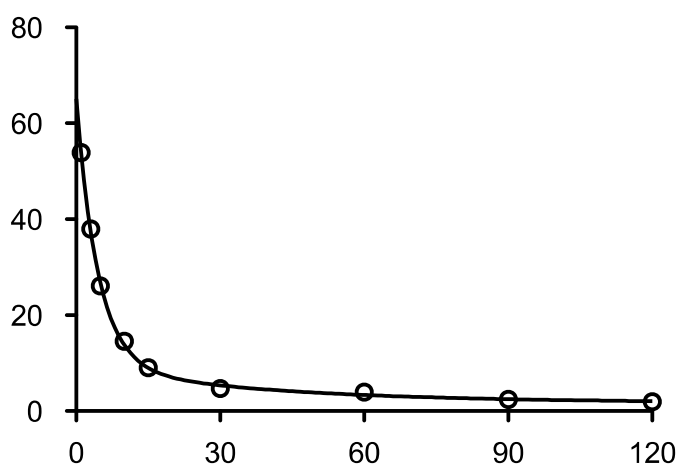

**Figure S4. Blood half-life data for  $^{18}\text{F}$ -VHHs.** Data is reported as percent of injected dose per gram blood (%ID/g). Data was fitted to a two-compartment model (bi-exponential non-linear regression) to give a weighted blood half-life of 6.0 min.

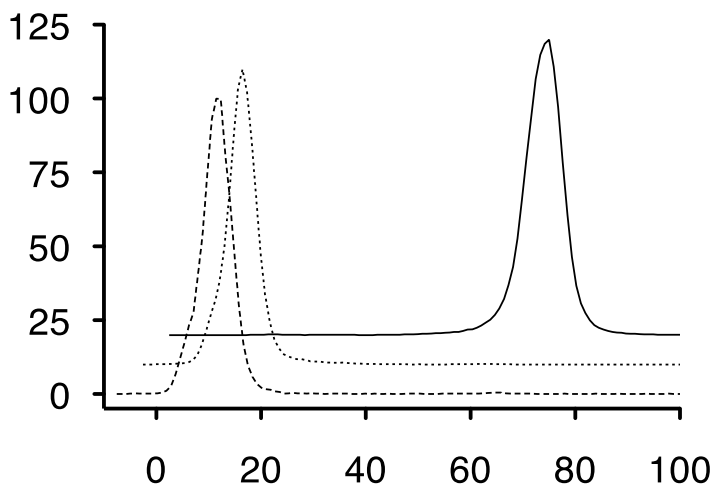

**Figure S5. Radio-TLC analysis of  $^{18}\text{F}$ - VHHs.** Radio-TLC analysis of labeled VHHs was performed after size-exclusion chromatography demonstrating >98% radiochemical purity of all labeled VHHs.

#### References.

- (1) Chen, I., Dorr, B. M., and Liu, D. R. (2011) A general strategy for the evolution of bond-forming enzymes using yeast display. , *Proc. Natl. Acad. Sci. U. S. A.* *108*, 11399–11404.
- (2) Theile, C. S., Witte, M. D., Blom, A. E. M., Kundrat, L., Ploegh, H. L., and Guimaraes, C. P. (2013) Site-specific N-terminal labeling of proteins using sortase-mediated reactions. , *Nat. Protoc.* *8*, 1800–1807.
- (3) Witte, M. D., Cragolini, J. J., Dougan, S. K., Yoder, N. C., Popp, M. W., and Ploegh, H. L. (2012) Preparation of unnatural N-to-N and C-to-C protein fusions. , *Proc. Natl. Acad. Sci.* *109*, 11993–11998.
- (4) Keliher, E. J., Reiner, T., Turetsky, A., Hilderbrand, S. A., and Weissleder, R. (2011) High-Yielding, Two-Step  $^{18}\text{F}$  Labeling Strategy for  $^{18}\text{F}$ -PARP1 Inhibitors. , *ChemMedChem* *6*, 424–427.
